# Supplementary material for: Comparative Chloroplast Genome Analyses of Ilex (Aquifoliaceae): Insights Into Evolutionary Dynamics and Phylogenetic Relationships
Source: Research Square preprint supplement (doi:10.21203/rs.3.rs-930025/v1), 2021-10-07
Supplement: Supplementary file 1 [file 20f1c4de8857d7682a1ea935.xlsx]

## Sheet: Sheet1
Table S3. The number of complement, forward, palindromic, reverse and tandem long repeats in 41 chloroplast genomes of Ilex taxa.
Taxon	GenBank no.	Tandem	Forward	Palindromic	Complement	Reverse	Total
Ilex asprella	NC_045274	23	23	21	0	1	68
Ilex asprella var. tapuensis	MT767004	21	23	21	1	0	66
Ilex championii	MT764248	23	23	21	1	0	68
Ilex chapaensis	MT764251	21	24	21	1	0	67
Ilex cinerea	MT764247	23	23	19	0	0	65
Ilex cornuta	MT764252	23	23	19	0	1	66
Ilex crenata	MW528027	30	26	23	0	0	79
Ilex dabieshanensis	MT435529	23	23	20	0	0	66
Ilex dasyphylla	MT764253	25	24	21	0	0	70
Ilex dasyphylla	OK138727	25	24	21	0	0	70
Ilex delavayi	KX426470	25	26	23	0	0	74
Ilex dumosa	KP016927	20	22	22	0	0	64
Ilex ficoidea	MT764243	24	23	20	0	0	67
Ilex fukienensis	OK138728	23	22	21	1	0	67
Ilex graciliflora	MT764249	23	23	19	0	0	65
Ilex hanceana	MT764246	23	22	21	1	0	67
Ilex integra	NC_044417	24	23	20	0	1	68
Ilex intermedia	MT471320	24	23	21	0	0	68
Ilex kwangtungensis	MT764241	25	25	22	0	1	73
Ilex lancilimba	MT767005	25	24	23	1	1	74
Ilex latifolia	NC_047291	24	19	19	0	0	62
Ilex lohfauensis	MT764240	23	22	21	2	0	68
Ilex lohfauensis	OK138729	23	22	21	1	0	67
Ilex memecylifolia	MT764250	22	23	21	1	0	67
Ilex micrococca	MN830251	21	22	22	0	0	65
Ilex paraguariensis	NC_031207	25	22	21	0	0	68
Ilex polyneura	KX426468	25	24	23	0	0	72
Ilex pubescens	KX426467	27	24	23	0	2	76
Ilex purpurea	MT471318	26	24	21	0	0	71
Ilex rotunda	MW292559	26	25	23	0	1	75
Ilex sp.	KX426469	24	24	23	0	0	71
Ilex suaveolens	MN830249	25	24	22	1	2	74
Ilex szechwanensis	KX426466	24	24	23	0	0	71
Ilex triflora	MT764242	24	26	22	0	0	72
Ilex venusta	OK138730	25	25	22	0	1	73
Ilex viridis	MN830250	24	26	22	0	0	72
Ilex viridis	OK138731	22	24	22	0	0	68
Ilex vomitoria	MT471319	23	23	24	0	2	72
Ilex wilsonii	KX426471	23	23	23	1	0	70
Ilex yunnanensis	OK138732	27	24	20	0	1	72
Ilex zhejiangensis	OK138733	23	23	19	0	0	65
Total		979	962	876	12	14	2843
