# Supplementary material for: Comparative Chloroplast Genome Analyses of Ilex (Aquifoliaceae): Insights Into Evolutionary Dynamics and Phylogenetic Relationships
Source: Research Square preprint supplement (doi:10.21203/rs.3.rs-930025/v1), 2021-10-07
Supplement: Supplementary file 2 [file 734bb267c0f11fc8681d2898.xlsx]

## Sheet: Sheet1
Table S5. Voucher information and GenBank acccession numbers for Ilex taxa used in this study.
Taxon	Series	Subgenus	Section	GenBank no.	Voucher	Localiy	Reference
Ilex asprella (Hook. et Arn.) Champ. ex Benth.		Prinos	Prinoides	NC_045274	LNH180925042	Pangkan village, Suixi county, China	Chen et al. 2019
Ilex asprella (Hook. et Arn.) Champ. ex Benth.		Prinos	Prinoides	MT704834	LHK0012	Hong Kong, China	Kong et al. 2021
Ilex asprella var. tapuensis S. Y. Hu		Prinos	Prinoides	MT767004	NC045274	Hong Kong, China	Kong et al. 2021
Ilex championii Loes.	Hanceanae	Ilex	Pseudoaquifolium	MT764248	H0869	Hong Kong, China	Kong et al. 2021
Ilex chapaensis Merr.	na	Prinos	Prinoides	MT764251	H0900	Hong Kong, China	Kong et al. 2021
Ilex cinerea Champ.	Repandae	Ilex	Aquifolium	MT764247	H0884	Hong Kong, China	Kong et al. 2021
Ilex cornuta Lindl. et Paxt.	Aquifolioides	Ilex	Aquifolium	MT764252	H0909	Hong Kong, China	Kong et al. 2021
Ilex cornuta Lindl. et Paxt.	Aquifolioides	Ilex	Aquifolium	NC_044416	S. Nam IB-00590	South Chungcheong	Park et al. 2019
Ilex cornuta Lindl. et Paxt.	Aquifolioides	Ilex	Aquifolium	MK335536	S. Nam IB-00590	South Chungcheong	Park et al. 2019
Ilex crenata	Stigmatophorae	Ilex	Paltoria	MW528027	NBGJIB-Ilex-0007	Nanjing, China	Fan et al. 2021
Ilex dabieshanensis K. Yao et M. P. Deng	Aquifolioides	Ilex	Aquifolium	MT435529	na	na	Zhang unpublished
Ilex dabieshanensis K. Yao et M. P. Deng	Aquifolioides	Ilex	Aquifolium	MW292560	na	na	Chen unpublished
Ilex dasyphylla Merr.	Chinenses	Ilex	Lioprinus	MT764253	H0911	Hong Kong, China	Kong et al. 2021
Ilex dasyphylla Merr.	Chinenses	Ilex	Lioprinus	OK138727	XKW662	Fujian, China	This study
Ilex delavayi Franch.	Hookerianae	Ilex	Aquifolium	KX426470	YX1723	Yunnan, China	Yao et al. 2016
Ilex dumosa Reissek	na	na	na	KP016927	na	na	Cascales et al. 2017
Ilex ficoidea Hemsl.	Repandae	Ilex	Aquifolium	MT764243	H0875	Hong Kong, China	Kong et al. 2021
Ilex fukienensis S. Y. Hu	Longecaudatae	Ilex	Pseudoaquifolium	OK138728	XKW663	Fujian, China	This study
Ilex graciliflora Champ.	Denticulatae	Ilex	Aquifolium	MT764249	H0886	Hong Kong, China	Kong et al. 2021
Ilex hanceana Maxim.	Hanceanae	Ilex	Pseudoaquifolium	MT764246	H0882	Hong Kong, China	Kong et al. 2021
Ilex integra Thunb.	Denticulatae	Ilex	Aquifolium	NC_044417	S. Nam IB-00591	Tae-an gun, Korea	Park et al. 2019
Ilex integra Thunb.	Denticulatae	Ilex	Aquifolium	MK335537	S. Nam, IB-00591	Tae-an gun, Korea	Park et al. 2019
Ilex intermedia Loes. ex Diels	Repandae	Ilex	Aquifolium	MT471320	na	na	Zhang unpublished
Ilex kwangtungensis Merr.	Chinenses	Ilex	Lioprinus	MT764241	H0872	Hong Kong, China	Kong et al. 2021
Ilex lancilimba Merr.	Chinenses	Ilex	Lioprinus	MT767005	H0910	na	Kong et al. 2021
Ilex latifolia Thunb.	Denticulatae	Ilex	Aquifolium	NC_047291	Y.-C. Shi et al. H1127	Guangxi, China	Shi & Liu 2019
Ilex latifolia Thunb.	Denticulatae	Ilex	Aquifolium	KX426465	YX1303	Yunnan, China	Yao et al. 2016
Ilex latifolia Thunb.	Denticulatae	Ilex	Aquifolium	MT764239	H0869	Hong Kong, China	Kong et al. 2021
Ilex lohfauensis Merr.	Hanceanae	Ilex	Pseudoaquifolium	MT764240	H0871	Hong Kong, China	Kong et al. 2021
Ilex lohfauensis Merr.	Hanceanae	Ilex	Pseudoaquifolium	OK138729	XKW661	Fujian, China	This study
Ilex memecylifolia Champ. ex Benth.	Sideroxyloides	Ilex	Pseudoaquifolium	MT764250	H0898	Hong Kong, China	Kong et al. 2021
Ilex micrococca Maxim.	na	Prinos	Micrococca	MN830251	na	Anhui, China	Su et al. 2020
Ilex paraguariensis A. St.-Hil.	na	na	na	NC_031207	na	na	Cascales et al. 2017
Ilex polyneura (Hand.-Mazz.) S. Y. Hu		Prinos	Micrococca	KX426468	YX1680	Yunnan, China	Yao et al. 2016
Ilex pubescens Hook. et Arn.	Prinifoliae	Ilex	Pseudoaquifolium	KX426467	YX1676	Yunnan, China	Yao et al. 2016
Ilex pubescens Hook. et Arn.	Prinifoliae	Ilex	Pseudoaquifolium	MT764245	H0880	Hong Kong, China	Kong et al. 2021
Ilex purpurea Hassk.	Chinenses	Ilex	Lioprinus	MT471318	na	na	Zhang unpublished
Ilex rotunda Thunb.	Umbelliformes	Ilex	Lioprinus	MW292559	NBGJIB-Ilex-0056	Nanjing, China	Chen et al. 2021
Ilex rotunda Thunb.	Umbelliformes	Ilex	Lioprinus	MT764244	H0876	Hong Kong, China	Kong et al. 2021
Ilex sp.	na	na	na	KX426469	YX1681	Yunnan, China	Yao et al. 2016
Ilex suaveolens (Levl.) Loes.	Chinenses	Ilex	Lioprinus	MN830249	MN830249	Hong Kong, China	Kong et al. 2021
Ilex szechwanensis Loes.	Stigmatophorae	Ilex	Paltoria	KX426466	YX1418	Yunnan, China	Yao et al. 2016
Ilex triflora Bl.	Stigmatophorae	Ilex	Paltoria	MT764242	H0874	Hong Kong, China	Kong et al. 2021
Ilex venusta H.Peng & W.B.Liao	Stigmatophorae	Ilex	Paltoria	OK138730	LXC22274	Jiangxi, China	This study
Ilex viridis Champ. ex Benth.	Stigmatophorae	Ilex	Paltoria	MN830250	na	Anhui, China	Su et al. 2020
Ilex viridis Champ. ex Benth.	Stigmatophorae	Ilex	Paltoria	MT764254	H2530	Hong Kong, China	Kong et al. 2021
Ilex viridis Champ. ex Benth.	Stigmatophorae	Ilex	Paltoria	OK138731	XKW647	Hainan, China	This study
Ilex vomitoria	na	na	na	MT471319	NBGJIB-Ilex-0016	Nanjing, China	Zhang unpublished
Ilex wilsonii Loes.	Longecaudatae	Ilex	Pseudoaquifolium	KX426471	YX1748	Jiangxi, China	Yao et al. 2016
Ilex yunnanensis Franch.	Stigmatophorae	Ilex	Paltoria	OK138732	XKW569	Sichuan, China	This study
Ilex zhejiangensis C. J. Tseng ex S. K. Chen et Y. X. Feng	Aquifolioides	Ilex	Aquifolium	OK138733	LSX24558	Jiangxi, China	This study
