# Supplementary material for: Comparative Chloroplast Genome Analyses of Ilex (Aquifoliaceae): Insights Into Evolutionary Dynamics and Phylogenetic Relationships
Source: Research Square preprint supplement (doi:10.21203/rs.3.rs-930025/v1), 2021-10-07
Supplement: Supplementary file 3 [file c235768513e9b8110f01a0cd.xls]

## Sheet: Sheet1
Table S4. Relative synonymous codon usage (RSCU) values among the the 41 Ilex chloroplast genomes.
Species	Ala(A)						Cys(C)				Asp(D)				Glu(E）				Phe(F)				Gly(G)						His(H)				Ile(I)					Lys(K)				Leu(L)
	Codon	Freq	GCU(A)	GCC(A)	GCA(A)	GCG(A)	Codon	Freq	UGU(C)	UGC(C)	Codon	Freq	GAU(D)	GAC(D)	Codon	Freq	GAA(E)	GAG(E)	Codon	Freq	UUU(F)	UUC(F)	Codon	Freq	GGU(G)	GGC(G)	GGA(G)	GGG(G)	Codon	Freq	CAU(H)	CAC(H)	Codon	Freq	AUU(I)	AUC(I)	AUA(I)	Codon	Freq	AAA(K)	AAG(K)	Codon	Freq	UUA(L)	UUG(L)	CUU(L)	CUC(L)	CUA(L)	CUG(L)
Ilex asprella	1277	0.0553	1.84	0.62	1.18	0.35	263	0.0114	1.54	0.46	977	0.0423	1.62	0.38	1180	0.0511	1.49	0.51	1263	0.0547	1.24	0.76	1636	0.0708	1.28	0.41	1.61	0.7	573	0.0248	1.56	0.44	1960	0.0849	1.47	0.63	0.9	1118	0.0484	1.45	0.55	2430	0.1052	1.81	1.27	1.25	0.43	0.84	0.4
Ilex asprella var. tapuensis	1280	0.0554	1.85	0.62	1.18	0.35	263	0.0114	1.53	0.47	975	0.0422	1.62	0.38	1181	0.0511	1.48	0.52	1264	0.0547	1.25	0.75	1634	0.0707	1.28	0.41	1.61	0.7	574	0.0248	1.56	0.44	1960	0.0848411	1.47	0.63	0.9	1117	0.0484	1.45	0.55	2428	0.1051	1.82	1.27	1.26	0.43	0.83	0.4
Ilex championii	1281	0.0554	1.85	0.62	1.18	0.35	263	0.0114	1.53	0.47	977	0.0423	1.62	0.38	1179	0.051	1.49	0.51	1264	0.0547	1.25	0.75	1635	0.0708	1.28	0.41	1.61	0.7	574	0.0248	1.56	0.44	1964	0.085	1.47	0.63	0.9	1118	0.0484	1.45	0.55	2431	0.1052	1.82	1.27	1.25	0.42	0.84	0.39
Ilex chapaensis	1280	0.0554	1.85	0.62	1.18	0.35	263	0.0114	1.53	0.47	975	0.0422	1.62	0.38	1181	0.0511	1.48	0.52	1264	0.0547	1.25	0.75	1634	0.0707	1.28	0.41	1.61	0.7	574	0.0248	1.56	0.44	1960	0.0848	1.47	0.63	0.9	1117	0.0484	1.45	0.55	2428	0.1051	1.82	1.27	1.26	0.43	0.83	0.4
Ilex cinerea	1278	0.0553	1.85	0.6	1.2	0.34	266	0.0115	1.53	0.47	976	0.0422	1.62	0.38	1179	0.051	1.48	0.52	1265	0.0547	1.24	0.76	1636	0.0708	1.28	0.41	1.61	0.7	574	0.0248	1.55	0.45	1964	0.085	1.47	0.63	0.9	1120	0.0485	1.46	0.54	2432	0.1052	1.81	1.27	1.26	0.43	0.84	0.39
Ilex cornuta	1278	0.0553	1.85	0.6	1.2	0.34	266	0.0115	1.53	0.47	976	0.0422	1.62	0.38	1179	0.051	1.48	0.52	1265	0.0547	1.24	0.76	1636	0.0708	1.28	0.41	1.61	0.7	574	0.0248	1.55	0.45	1964	0.085	1.47	0.63	0.9	1120	0.0485	1.46	0.54	2432	0.1052	1.81	1.27	1.26	0.43	0.84	0.39
Ilex crenata	1280	0.0554	1.84	0.62	1.19	0.35	264	0.0114	1.52	0.48	979	0.0424	1.62	0.38	1181	0.0511	1.48	0.52	1263	0.0546	1.24	0.76	1634	0.0707	1.28	0.42	1.61	0.69	575	0.0249	1.56	0.44	1960	0.0848	1.47	0.63	0.9	1120	0.0485	1.46	0.54	2444	0.1057	1.81	1.26	1.26	0.43	0.84	0.4
Ilex dabieshanensis	1278	0.0552	1.85	0.6	1.2	0.35	268	0.0116	1.53	0.47	977	0.0422	1.62	0.38	1179	0.051	1.48	0.52	1269	0.0548	1.24	0.76	1637	0.0708	1.28	0.41	1.61	0.7	574	0.0248	1.55	0.45	1968	0.0851	1.47	0.63	0.9	1116	0.0482	1.46	0.54	2435	0.1052	1.81	1.27	1.26	0.43	0.84	0.39
Ilex dasyphylla	1280	0.0554	1.85	0.62	1.18	0.35	264	0.0114	1.52	0.48	975	0.0422	1.62	0.38	1182	0.0512	1.48	0.52	1259	0.0545	1.24	0.76	1636	0.0708	1.28	0.41	1.61	0.69	573	0.0248	1.56	0.44	1961	0.0849	1.47	0.63	0.9	1119	0.0484	1.46	0.54	2437	0.1055	1.82	1.27	1.26	0.42	0.83	0.4
Ilex dasyphylla	1280	0.0553	1.84	0.62	1.18	0.35	266	0.0115	1.53	0.47	975	0.0422	1.62	0.38	1182	0.0511	1.48	0.52	1260	0.0545	1.24	0.76	1639	0.0709	1.28	0.41	1.61	0.7	573	0.0248	1.56	0.44	1964	0.0849	1.46	0.63	0.9	1119	0.0484	1.46	0.54	2438	0.1054	1.82	1.27	1.26	0.43	0.83	0.4
Ilex delavayi	1285	0.0556	1.84	0.61	1.2	0.35	266	0.0115	1.53	0.47	978	0.0423	1.62	0.38	1178	0.0509	1.48	0.52	1262	0.0546	1.24	0.76	1635	0.0707	1.28	0.41	1.61	0.7	575	0.0249	1.55	0.45	1966	0.085	1.46	0.63	0.91	1114	0.0482	1.46	0.54	2432	0.1051	1.81	1.28	1.26	0.43	0.83	0.39
Ilex dumosa	1278	0.0553	1.86	0.6	1.19	0.35	264	0.0114	1.52	0.48	978	0.0424	1.61	0.39	1175	0.0509	1.48	0.52	1263	0.0547	1.24	0.76	1635	0.0708	1.27	0.41	1.61	0.7	577	0.025	1.56	0.44	1965	0.0851	1.47	0.63	0.91	1115	0.0483	1.46	0.54	2428	0.1051	1.82	1.27	1.26	0.43	0.83	0.39
Ilex ficoidea	1278	0.0553	1.85	0.6	1.2	0.34	266	0.0115	1.53	0.47	976	0.0422	1.62	0.38	1179	0.051	1.48	0.52	1266	0.0548	1.24	0.76	1637	0.0708	1.28	0.41	1.61	0.7	574	0.0248	1.55	0.45	1964	0.085	1.47	0.63	0.9	1120	0.0485	1.46	0.54	2432	0.1052	1.81	1.27	1.26	0.43	0.84	0.39
Ilex fukienensis	1282	0.0554	1.84	0.62	1.18	0.36	265	0.0115	1.53	0.47	977	0.0422	1.62	0.38	1179	0.051	1.49	0.51	1265	0.0547	1.24	0.76	1638	0.0708	1.28	0.41	1.6	0.7	574	0.0248	1.56	0.44	1969	0.0851	1.46	0.63	0.9	1118	0.0483	1.45	0.55	2431	0.1051	1.82	1.27	1.25	0.43	0.84	0.39
Ilex graciliflora	1278	0.0553	1.85	0.6	1.2	0.34	266	0.0115	1.53	0.47	976	0.0422	1.62	0.38	1179	0.051	1.48	0.52	1265	0.0547	1.24	0.76	1636	0.0708	1.28	0.41	1.61	0.7	574	0.0248	1.55	0.45	1964	0.085	1.47	0.63	0.9	1120	0.0485	1.46	0.54	2432	0.1052	1.81	1.27	1.26	0.43	0.84	0.39
Ilex hanceana	1282	0.0555	1.84	0.62	1.18	0.35	263	0.0114	1.53	0.47	977	0.0423	1.62	0.38	1179	0.051	1.49	0.51	1264	0.0547	1.25	0.75	1635	0.0708	1.28	0.41	1.61	0.7	574	0.0248	1.56	0.44	1964	0.085	1.47	0.63	0.9	1118	0.0484	1.45	0.55	2430	0.1052	1.82	1.27	1.25	0.42	0.84	0.4
Ilex integra	1277	0.0553	1.85	0.6	1.2	0.34	266	0.0115	1.53	0.47	976	0.0422	1.62	0.38	1179	0.051	1.48	0.52	1265	0.0547	1.24	0.76	1637	0.0708	1.28	0.41	1.61	0.69	574	0.0248	1.55	0.45	1964	0.085	1.47	0.63	0.9	1120	0.0485	1.46	0.54	2432	0.1052	1.81	1.27	1.26	0.43	0.84	0.39
Ilex intermedia	1275	0.0551	1.85	0.6	1.2	0.35	267	0.0115	1.54	0.46	976	0.0422	1.62	0.38	1179	0.051	1.48	0.52	1268	0.0548	1.24	0.76	1637	0.0708	1.28	0.41	1.61	0.7	574	0.0248	1.55	0.45	1965	0.085	1.47	0.63	0.9	1120	0.0484	1.46	0.54	2434	0.1052	1.81	1.27	1.26	0.43	0.84	0.4
Ilex kwangtungensis	1280	0.0554	1.85	0.62	1.18	0.35	264	0.0114	1.52	0.48	975	0.0422	1.62	0.38	1181	0.0511	1.48	0.52	1260	0.0545	1.24	0.76	1635	0.0708	1.28	0.41	1.61	0.69	573	0.0248	1.56	0.44	1963	0.085	1.46	0.63	0.91	1119	0.0484	1.46	0.54	2436	0.1054	1.82	1.27	1.26	0.42	0.83	0.39
Ilex lancilimba	1279	0.0554	1.85	0.62	1.19	0.35	265	0.0115	1.52	0.48	977	0.0423	1.62	0.38	1179	0.051	1.48	0.52	1258	0.0545	1.24	0.76	1635	0.0708	1.28	0.41	1.61	0.69	574	0.0248	1.55	0.45	1963	0.085	1.47	0.63	0.91	1119	0.0484	1.46	0.54	2438	0.1055	1.81	1.28	1.26	0.43	0.83	0.4
Ilex latifolia	1277	0.0552	1.84	0.6	1.2	0.35	268	0.0116	1.53	0.47	976	0.0422	1.62	0.38	1179	0.051	1.48	0.52	1266	0.0548	1.24	0.76	1638	0.0708	1.28	0.41	1.61	0.7	574	0.0248	1.55	0.45	1967	0.0851	1.47	0.63	0.9	1116	0.0483	1.46	0.54	2433	0.1052	1.81	1.27	1.26	0.43	0.84	0.39
Ilex lohfauensis	1282	0.0555	1.85	0.62	1.18	0.35	263	0.0114	1.53	0.47	976	0.0422	1.62	0.38	1179	0.051	1.49	0.51	1264	0.0547	1.25	0.75	1635	0.0708	1.28	0.41	1.61	0.7	574	0.0248	1.56	0.44	1964	0.085	1.47	0.63	0.9	1118	0.0484	1.45	0.55	2431	0.1052	1.82	1.27	1.25	0.42	0.84	0.4
Ilex lohfauensis	1281	0.0554	1.84	0.62	1.18	0.36	265	0.0115	1.53	0.47	977	0.0422	1.62	0.38	1179	0.051	1.49	0.51	1264	0.0546	1.25	0.75	1638	0.0708	1.28	0.41	1.6	0.7	574	0.0248	1.56	0.44	1967	0.085	1.47	0.63	0.9	1118	0.0483	1.45	0.55	2433	0.1052	1.82	1.27	1.26	0.43	0.84	0.39
Ilex memecylifolia	1282	0.0555	1.85	0.62	1.18	0.35	264	0.0114	1.53	0.47	978	0.0423	1.62	0.38	1180	0.0511	1.48	0.52	1264	0.0547	1.25	0.75	1633	0.0707	1.28	0.41	1.61	0.7	574	0.0248	1.56	0.44	1962	0.0849	1.47	0.63	0.9	1119	0.0484	1.45	0.55	2430	0.1052	1.82	1.27	1.25	0.43	0.83	0.4
Ilex micrococca	1280	0.0553	1.84	0.63	1.18	0.35	266	0.0115	1.53	0.47	978	0.0423	1.62	0.38	1179	0.051	1.49	0.51	1266	0.0547	1.25	0.75	1634	0.0707	1.29	0.41	1.61	0.69	575	0.0249	1.55	0.45	1963	0.0849	1.47	0.62	0.91	1118	0.0483	1.46	0.54	2432	0.1052	1.82	1.27	1.26	0.43	0.83	0.39
Ilex paraguariensis	1282	0.0555	1.85	0.61	1.2	0.35	264	0.0114	1.53	0.47	979	0.0424	1.62	0.38	1176	0.0509	1.48	0.52	1261	0.0546	1.25	0.75	1633	0.0707	1.27	0.42	1.61	0.7	573	0.0248	1.56	0.44	1961	0.0849	1.47	0.63	0.91	1121	0.0485	1.46	0.54	2431	0.1052	1.81	1.27	1.26	0.42	0.84	0.39
Ilex polyneura	1277	0.0552	1.84	0.62	1.18	0.36	267	0.0115	1.53	0.47	978	0.0423	1.62	0.38	1180	0.051	1.48	0.52	1266	0.0547	1.24	0.76	1638	0.0708	1.28	0.41	1.61	0.7	573	0.0248	1.55	0.45	1961	0.0848	1.47	0.63	0.9	1111	0.048	1.46	0.54	2435	0.1053	1.81	1.27	1.26	0.42	0.84	0.39
Ilex pubescens	1277	0.0552	1.84	0.62	1.18	0.36	267	0.0115	1.53	0.47	977	0.0422	1.62	0.38	1180	0.051	1.48	0.52	1266	0.0547	1.24	0.76	1638	0.0708	1.29	0.41	1.61	0.69	574	0.0248	1.55	0.45	1960	0.0847	1.47	0.63	0.9	1111	0.048	1.46	0.54	2437	0.1054	1.81	1.27	1.26	0.42	0.84	0.39
Ilex purpurea	1278	0.0552	1.84	0.62	1.19	0.35	266	0.0115	1.53	0.47	979	0.0423	1.62	0.38	1181	0.0511	1.48	0.52	1264	0.0546	1.25	0.75	1634	0.0706	1.29	0.41	1.61	0.69	574	0.0248	1.55	0.45	1964	0.0849	1.46	0.63	0.91	1119	0.0484	1.46	0.54	2443	0.1056	1.81	1.27	1.26	0.42	0.83	0.4
Ilex rotunda	1274	0.0551	1.84	0.62	1.19	0.35	265	0.0115	1.52	0.48	978	0.0423	1.62	0.38	1180	0.0511	1.48	0.52	1264	0.0547	1.24	0.76	1636	0.0708	1.28	0.41	1.61	0.7	574	0.0248	1.56	0.44	1959	0.0848	1.47	0.62	0.91	1116	0.0483	1.46	0.54	2435	0.1054	1.81	1.27	1.26	0.42	0.85	0.39
Ilex sp.	1279	0.0553	1.85	0.61	1.2	0.35	268	0.0116	1.53	0.47	976	0.0422	1.62	0.38	1178	0.0509	1.48	0.52	1265	0.0547	1.24	0.76	1638	0.0708	1.28	0.41	1.61	0.7	574	0.0248	1.55	0.45	1966	0.085	1.47	0.63	0.9	1117	0.0483	1.46	0.54	2434	0.1052	1.81	1.27	1.26	0.43	0.84	0.39
Ilex suaveolens	1280	0.0553	1.84	0.62	1.18	0.35	266	0.0115	1.53	0.47	980	0.0424	1.62	0.38	1179	0.051	1.48	0.52	1263	0.0546	1.24	0.76	1636	0.0707	1.29	0.41	1.61	0.69	574	0.0248	1.55	0.45	1964	0.0849	1.46	0.63	0.91	1118	0.0483	1.46	0.54	2440	0.1055	1.81	1.27	1.26	0.43	0.83	0.4
Ilex szechwanensis	1283	0.0555	1.84	0.62	1.18	0.36	266	0.0115	1.53	0.47	978	0.0423	1.62	0.38	1178	0.0509	1.48	0.52	1262	0.0546	1.24	0.76	1637	0.0708	1.28	0.42	1.61	0.7	575	0.0249	1.55	0.45	1963	0.0849	1.46	0.63	0.91	1114	0.0482	1.46	0.54	2440	0.1055	1.82	1.27	1.26	0.43	0.83	0.4
Ilex triflora	1282	0.0555	1.84	0.61	1.19	0.35	264	0.0114	1.52	0.48	979	0.0424	1.62	0.38	1179	0.051	1.48	0.52	1261	0.0546	1.24	0.76	1634	0.0707	1.29	0.41	1.61	0.69	575	0.0249	1.55	0.45	1959	0.0848	1.46	0.63	0.9	1118	0.0484	1.46	0.54	2438	0.1055	1.82	1.27	1.26	0.43	0.83	0.4
Ilex venusta	1281	0.0554	1.83	0.62	1.19	0.36	266	0.0115	1.53	0.47	978	0.0423	1.62	0.38	1181	0.051	1.48	0.52	1264	0.0546	1.24	0.76	1637	0.0708	1.29	0.42	1.6	0.69	575	0.0249	1.55	0.45	1962	0.0848	1.46	0.63	0.9	1118	0.0483	1.46	0.54	2440	0.1055	1.82	1.26	1.26	0.43	0.83	0.4
Ilex viridis	1281	0.0554	1.84	0.62	1.19	0.36	266	0.0115	1.53	0.47	979	0.0423	1.62	0.38	1179	0.051	1.48	0.52	1262	0.0546	1.24	0.76	1635	0.0707	1.29	0.41	1.6	0.69	575	0.0249	1.55	0.45	1959	0.0847	1.46	0.63	0.9	1118	0.0484	1.46	0.54	2440	0.1055	1.81	1.27	1.26	0.43	0.83	0.4
Ilex viridis	1282	0.0554	1.84	0.62	1.19	0.36	266	0.0115	1.53	0.47	979	0.0423	1.62	0.38	1179	0.051	1.48	0.52	1262	0.0546	1.24	0.76	1637	0.0708	1.29	0.41	1.6	0.69	575	0.0249	1.55	0.45	1962	0.0848	1.46	0.63	0.9	1118	0.0483	1.46	0.54	2439	0.1054	1.82	1.27	1.26	0.43	0.83	0.4
Ilex vomitoria	1277	0.0552	1.84	0.6	1.2	0.35	266	0.0115	1.53	0.47	980	0.0424	1.62	0.38	1177	0.0509	1.49	0.51	1266	0.0547	1.25	0.75	1636	0.0707	1.28	0.42	1.61	0.7	574	0.0248	1.56	0.44	1963	0.0849	1.47	0.63	0.9	1121	0.0485	1.46	0.54	2431	0.1051	1.82	1.27	1.26	0.43	0.83	0.39
Ilex wilsonii	1282	0.0554	1.84	0.63	1.18	0.36	265	0.0115	1.53	0.47	977	0.0422	1.62	0.38	1180	0.051	1.48	0.52	1265	0.0547	1.25	0.75	1637	0.0708	1.29	0.41	1.61	0.7	574	0.0248	1.56	0.44	1967	0.085	1.46	0.63	0.9	1114	0.0482	1.45	0.55	2433	0.1052	1.82	1.27	1.25	0.43	0.83	0.4
Ilex yunnanensis	1279	0.0553	1.85	0.61	1.19	0.35	266	0.0115	1.53	0.47	983	0.0425	1.61	0.39	1176	0.0508	1.48	0.52	1262	0.0545	1.24	0.76	1638	0.0708	1.28	0.41	1.61	0.7	574	0.0248	1.56	0.44	1966	0.085	1.46	0.63	0.91	1118	0.0483	1.46	0.54	2440	0.1055	1.82	1.27	1.26	0.43	0.83	0.4
Ilex zhejiangensis	1278	0.0552	1.85	0.61	1.2	0.34	268	0.0116	1.53	0.47	976	0.0422	1.62	0.38	1179	0.051	1.48	0.52	1266	0.0547	1.24	0.76	1639	0.0708	1.28	0.41	1.61	0.7	574	0.0248	1.55	0.45	1967	0.085	1.47	0.63	0.9	1119	0.0484	1.46	0.54	2433	0.1052	1.81	1.27	1.26	0.43	0.84	0.39
[truncated: 59 more columns]
